# Supplementary material
Source: publisher figshare collection journal article supplement (https://frontiersin.figshare.com/ndownloader/files/30931759)

**Supplementary Figure S3.** Variant profiles for the 22 most male-biased satDNAs against their respective consensus sequences, arranged by most to least male-biased of the list according to the ratio quotient for F/M ratio. Topmost profiles correspond to the female copies and bottom profiles to the male ones for each satDNA. Divergence and abundance values for each selected satDNA are also specified. F = female; M = male.

### MelSat124-53

Divergence: F = 7.11% / M = 6.27%

Abundance: F = 0.0041% / M = 0.0252%

F/M ratio = 0.163

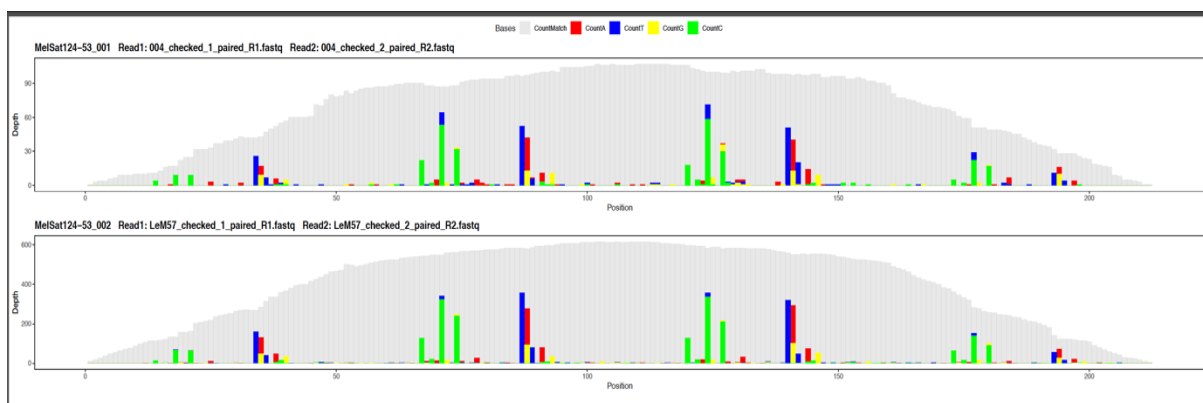

### MelSat59-61

Divergence: F = 7.77% / M = 7.43%

Abundance: F = 0.0197% / M = 0.0962%

F/M ratio = 0.204

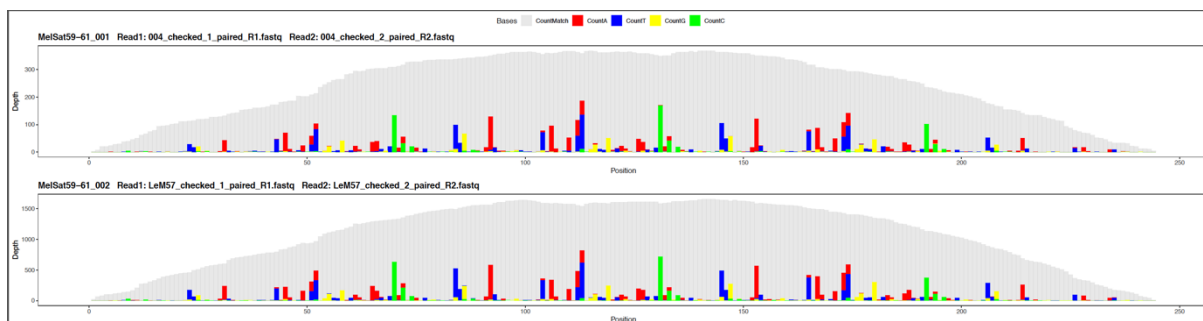

## MelSat43-26

Divergence: F = 7.26% / M = 6.81%

Abundance: F = 0.0262% / M = 0.1059%

F/M ratio = 0.247

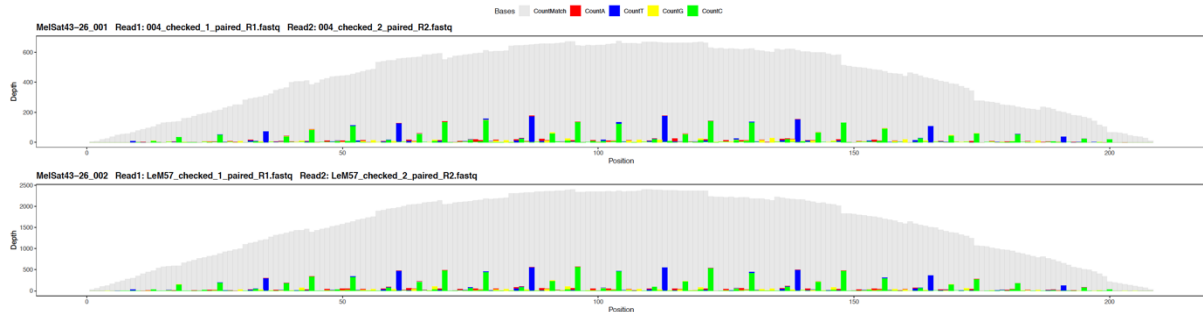

## MelSat98-69

Divergence: F = 3.9% / M = 3.9%

Abundance: F = 0.0065% / M = 0.0169%

F/M ratio = 0.385

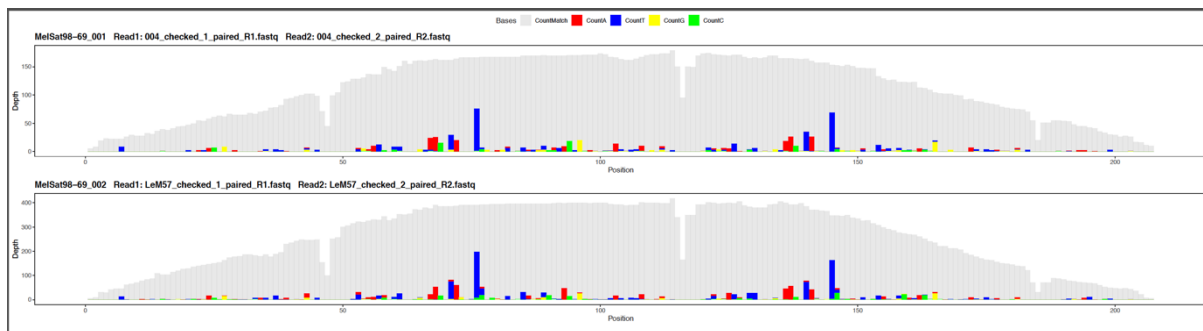

## MelSat80-50

Divergence: F = 5.4% / M = 5.21%

Abundance: F = 0.0125% / M = 0.0307%

F/M ratio = 0.408

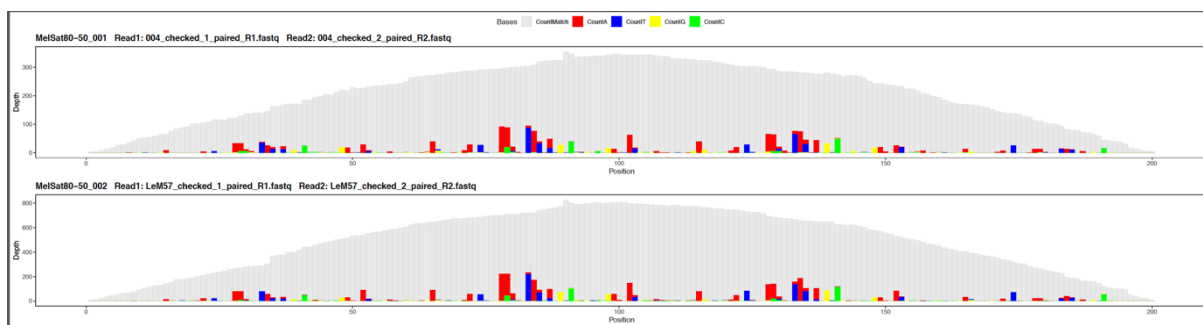

## MelSat102-38

Divergence: F = 3.41% / M = 2.75%

Abundance: F = 0.0062% / M = 0.0150%

F/M ratio = 0.415

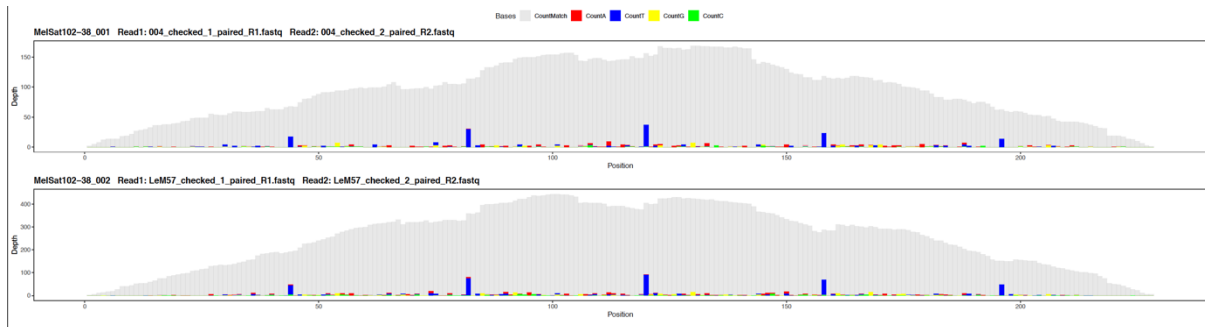

## MelSat49-33

Divergence: F = 7% / M = 7%

Abundance: F = 0.0241% / M = 0.0571%

F/M ratio = 0.422

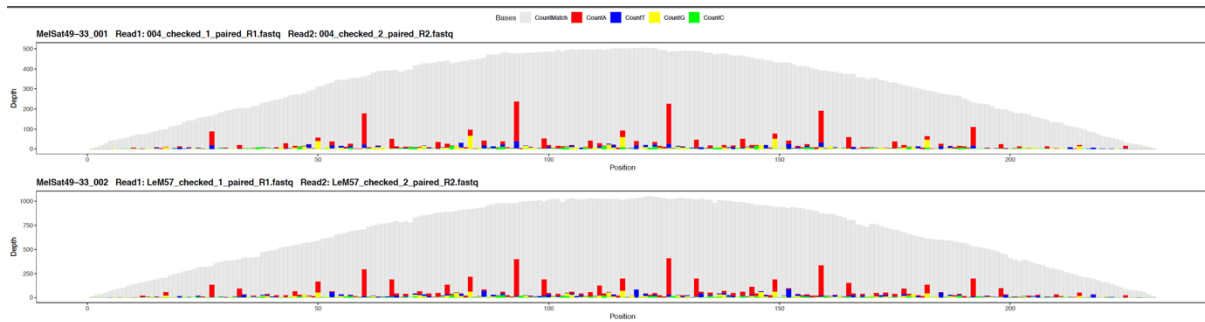

## MelSat129-45

Divergence: F = 9.5% / M = 9.41%

Abundance: F = 0.0030% / M = 0.0064%

F/M ratio = 0.468

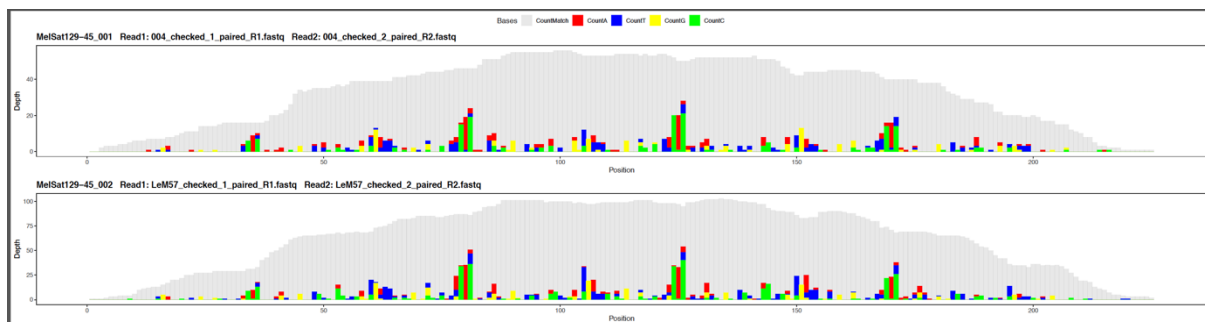

## MelSat46-45

Divergence: F = 6% / M = 4.9%

Abundance: F = 0.0248% / M = 0.0516%

F/M ratio = 0.479

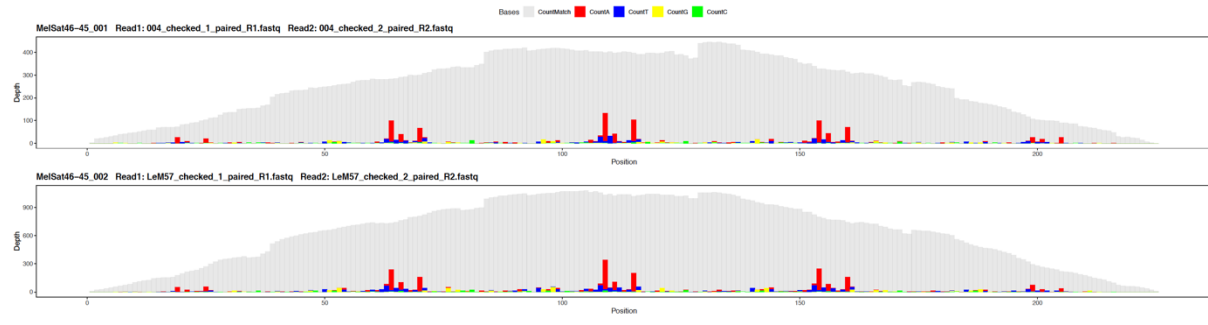

## MelSat140-24

Divergence: F = 6% / M = 10%

Abundance: F = 0.0005% / M = 0.0010%

F/M ratio = 0.496

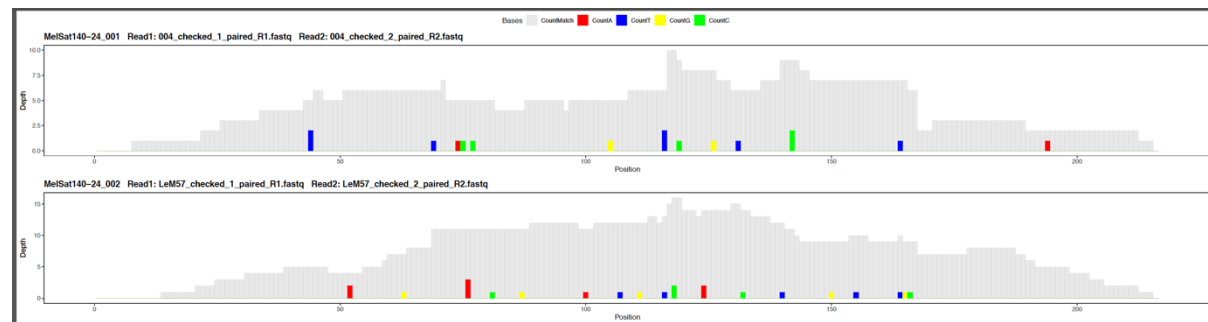

## MelSat132-36

Divergence: F = 5.49% / M = 4.74%

Abundance: F = 0.0023% / M = 0.0045%

F/M ratio = 0.503

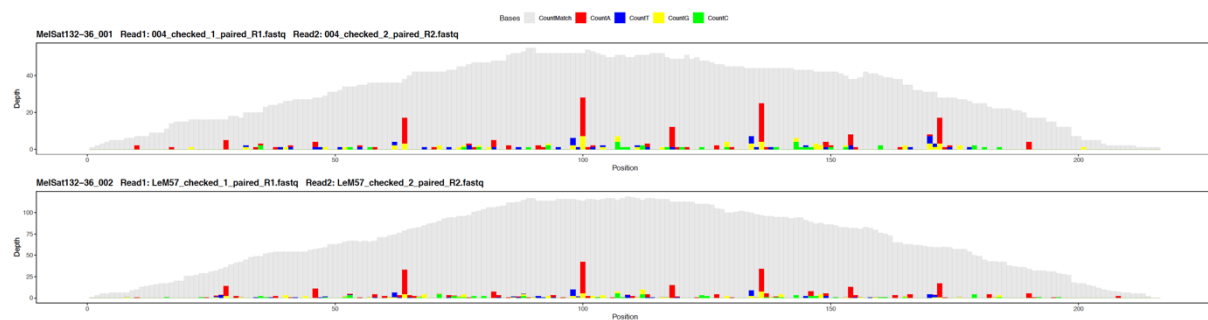

### MelSat69-33

Divergence: F = 4.68% / M = 4.15%

Abundance: F = 0.0149% / M = 0.0287%

F/M ratio = 0.519

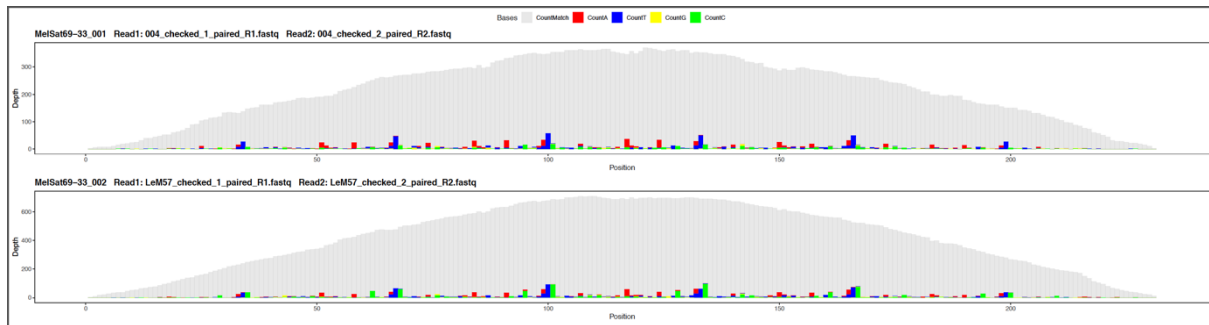

### MelSat100-22

Divergence: F = 8.22% / M = 7.64%

Abundance: F = 0.0063% / M = 0.0116%

F/M ratio = 0.542

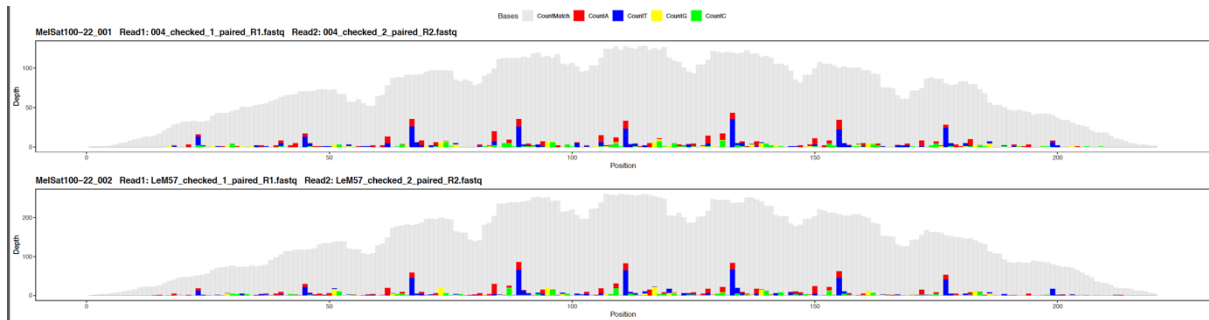

### MelSat101-15

Divergence: F = 15.4% / M = 14.91%

Abundance: F = 0.0063% / M = 0.0114%

F/M ratio = 0.551

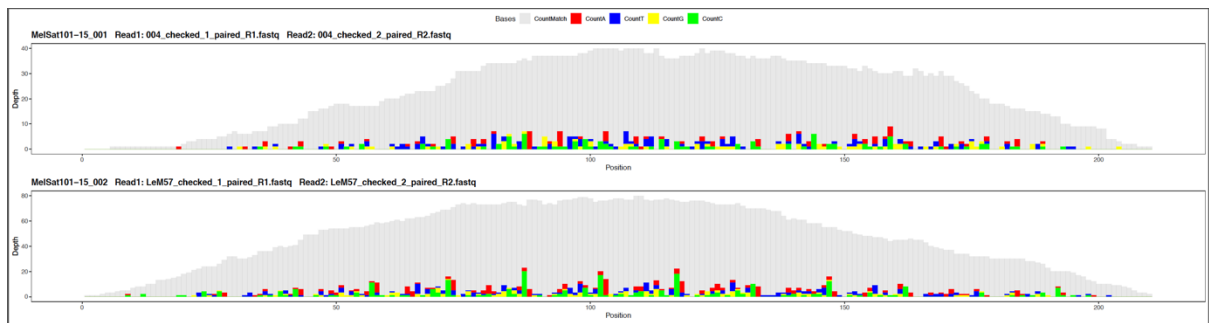

## MelSat92-31

Divergence: F = 8.58% / M = 7.76%

Abundance: F = 0.0082% / M = 0.0146%

F/M ratio = 0.561

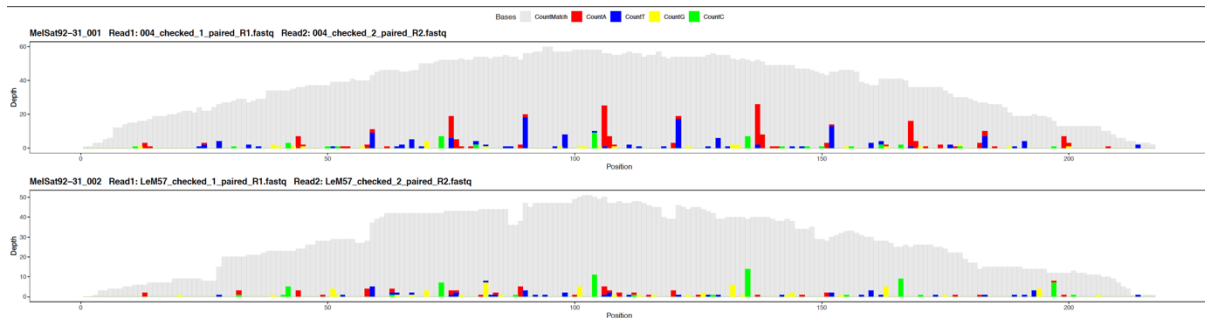

## MelSat30-22

Divergence: F = 6.54% / M = 6%

Abundance: F = 0.0353% / M = 0.0626%

F/M ratio = 0.564

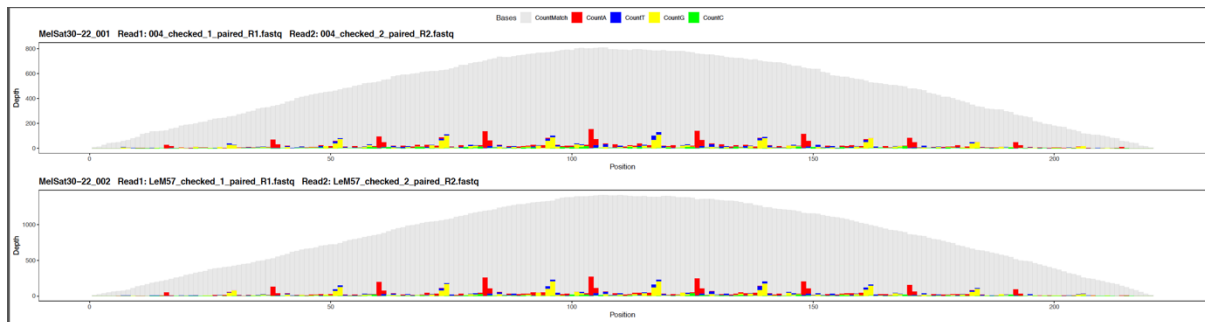

## MelSat117-49

Divergence: F = 5.41% / M = 4.58%

Abundance: F = 0.0048% / M = 0.0085%

F/M ratio = 0.567

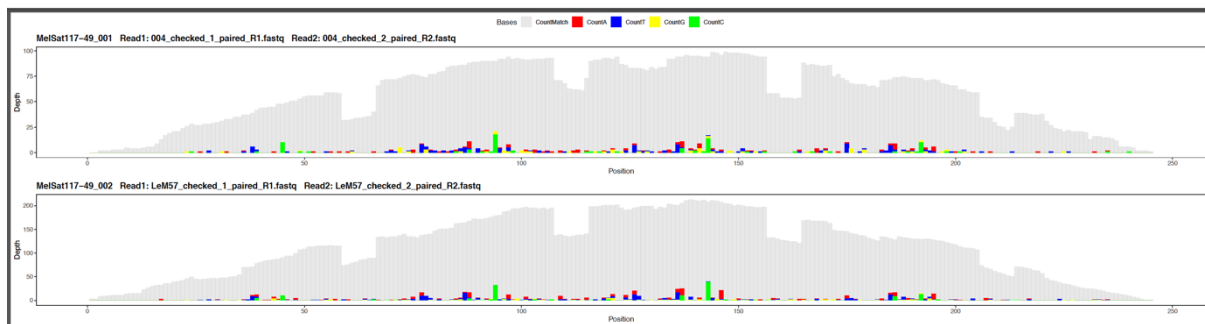

## MelSat78-24

Divergence: F = 21.86% / M = 20.15%

Abundance: F = 0.0137% / M = 0.0237%

F/M ratio = 0.580

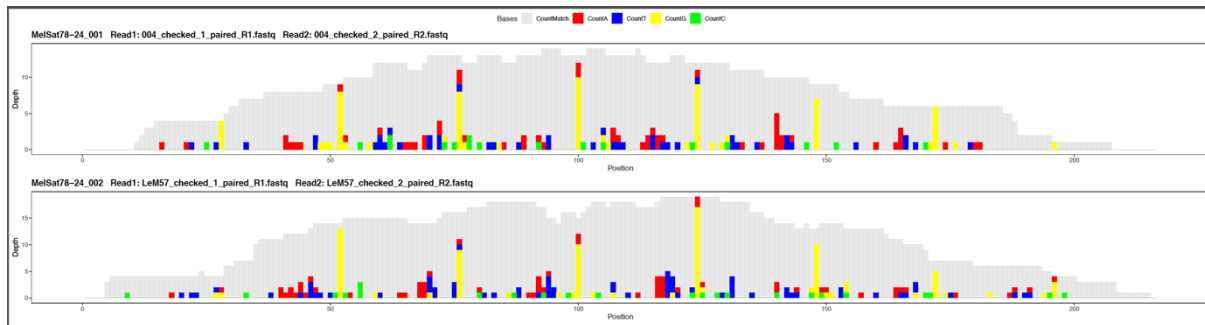

## MelSat62-32

Divergence: F = 11.86% / M = 10.84%

Abundance: F = 0.0187% / M = 0.0321%

F/M ratio = 0.581

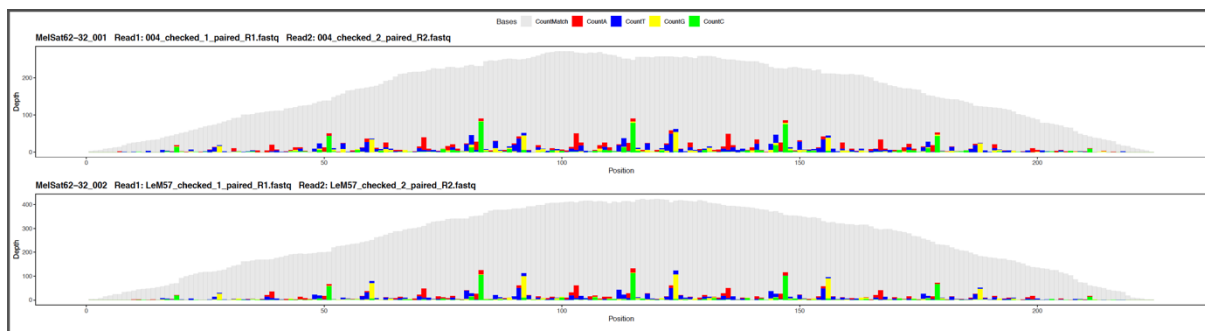

## MelSat137-21

Divergence: F = 16.08% / M = 14.23%

Abundance: F = 0.0020% / M = 0.0034%

F/M ratio = 0.6034

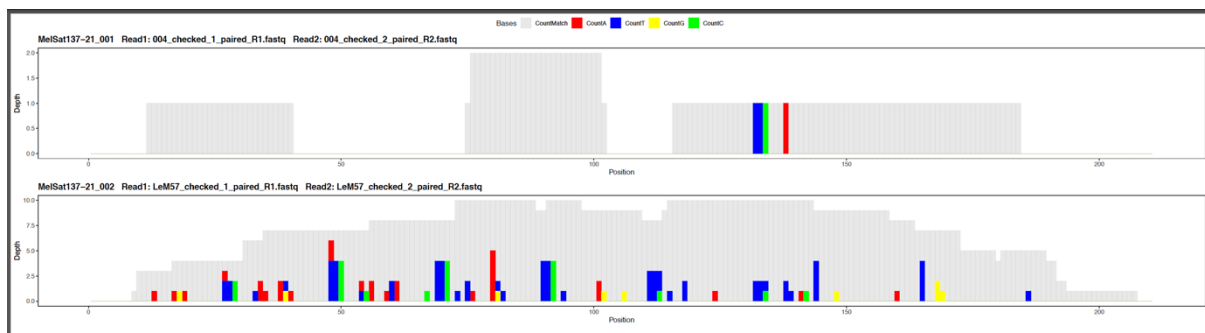

## MelSat135-66

Divergence: F = 6.2% / M = 4.44%

Abundance: F = 0.0020% / M = 0.0034%

F/M ratio = 0.6039

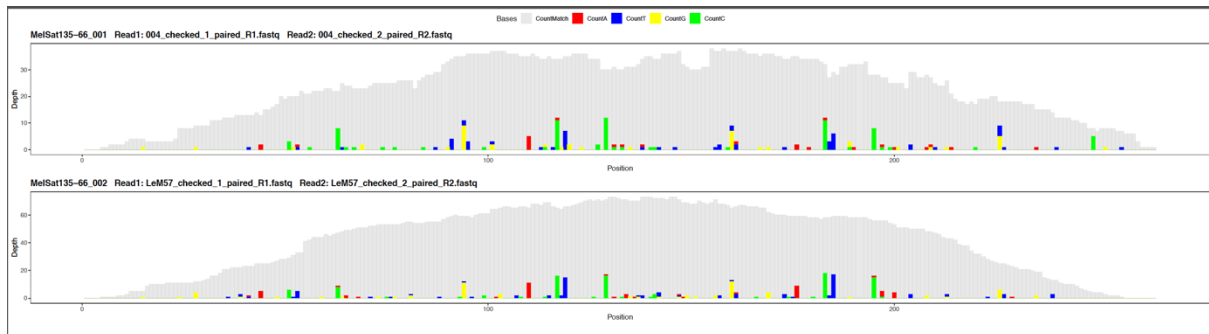

## MelSat118-43

Divergence: F = 25.82% / M = 16.21%

Abundance: F = 0.0046% / M = 0.0073%

F/M ratio = 0.633

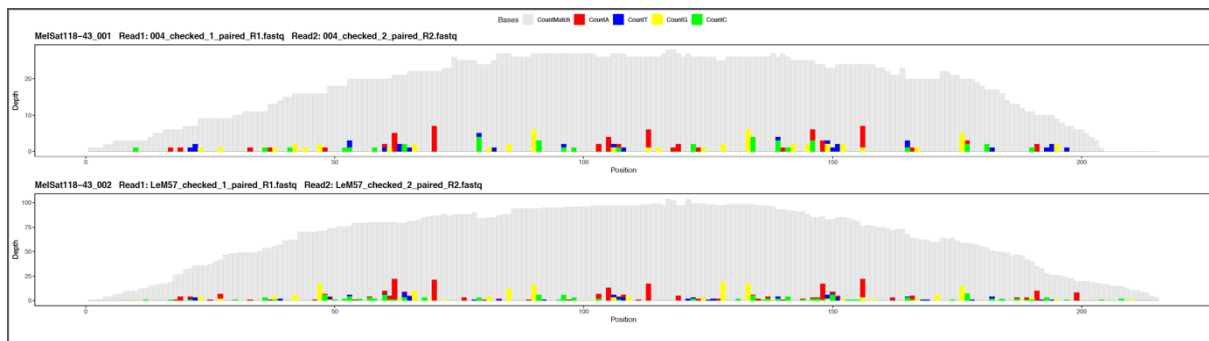

## MelSat48-29

Divergence: F = 16% / M = 14%

Abundance: F = 0.0243% / M = 0.0382%

F/M ratio = 0.636

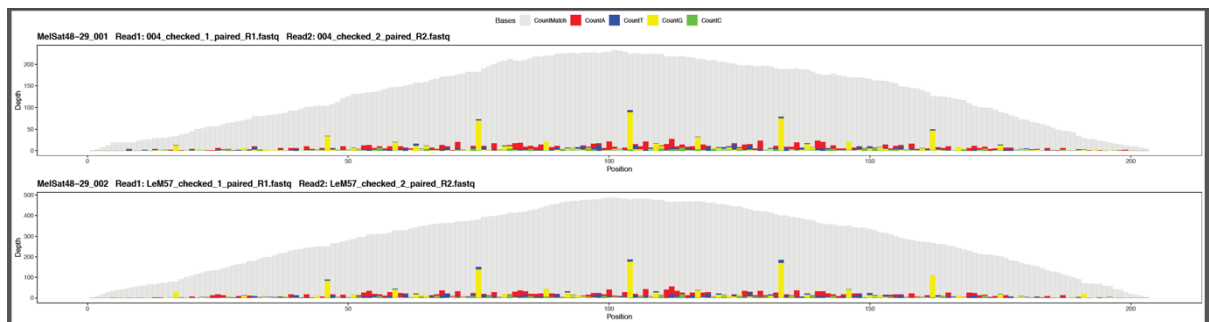

Supplement: Supplementary file [file 30931759]
